# Supplementary material for: PTP-3 phosphatase promotes intramolecular folding of SYD-2 to inactivate kinesin-3 UNC-104 in neurons
Source: PubMed Central journal article supplement — Mol Biol Cell. 2020 Dec 15;31(26):2932–47. doi: 10.1091/mbc.E19-10-0591 (PMC7927192; doi:10.1091/mbc.e19-10-0591), 2020-12-15
Supplement: mbc-31-2932-s001.pdf [file mbc-31-2932-s001.pdf]

# Supplemental Materials

*Molecular Biology of the Cell*

Shanmugam *et al.*

PTP-3 phosphatase promotes intramolecular folding of SYD-2 to inactivate kinesin-3  
UNC-104 in neurons

Muniesh Muthaiyan Shanmugam, Syed Nooruzuha Barmaver, Hsin-Yi Huang, Odvogmed  
Bayansan, Oliver Ingvar Wagner\*

Institute of Molecular and Cellular Biology, National Tsing Hua University, Hsinchu 30013, Taiwan  
(R.O.C).

**Running title:** PTP-3 controls SYD-2 binding to UNC-104

\*corresponding author

Dr. Oliver I. Wagner

Professor

National Tsing Hua University

Institute of Molecular and Cellular Biology & Department of Life Science

101, Sec. 2, Kuang-Fu Road, Hsinchu 30013, Taiwan (R. O. C.)

Email: owagner@life.nthu.edu.tw

Phone: +886-3-574-2487, Fax: +886-3-571-5934

## SUPPLEMENTAL FIGURE LEGENDS

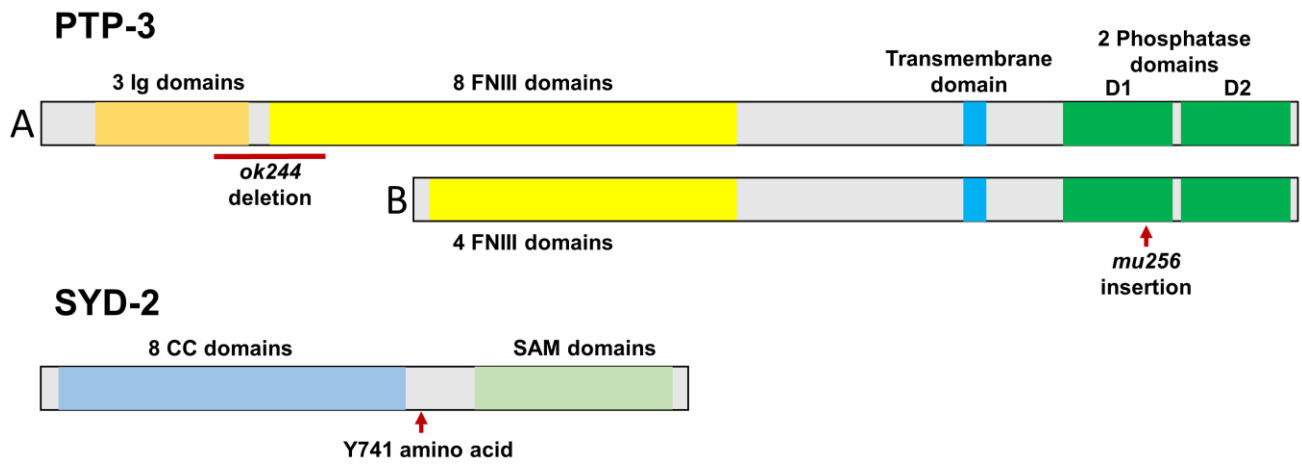

**Figure S1.** Domain structures of PTP-3A/B and SYD-2 with indicated mutant alleles.

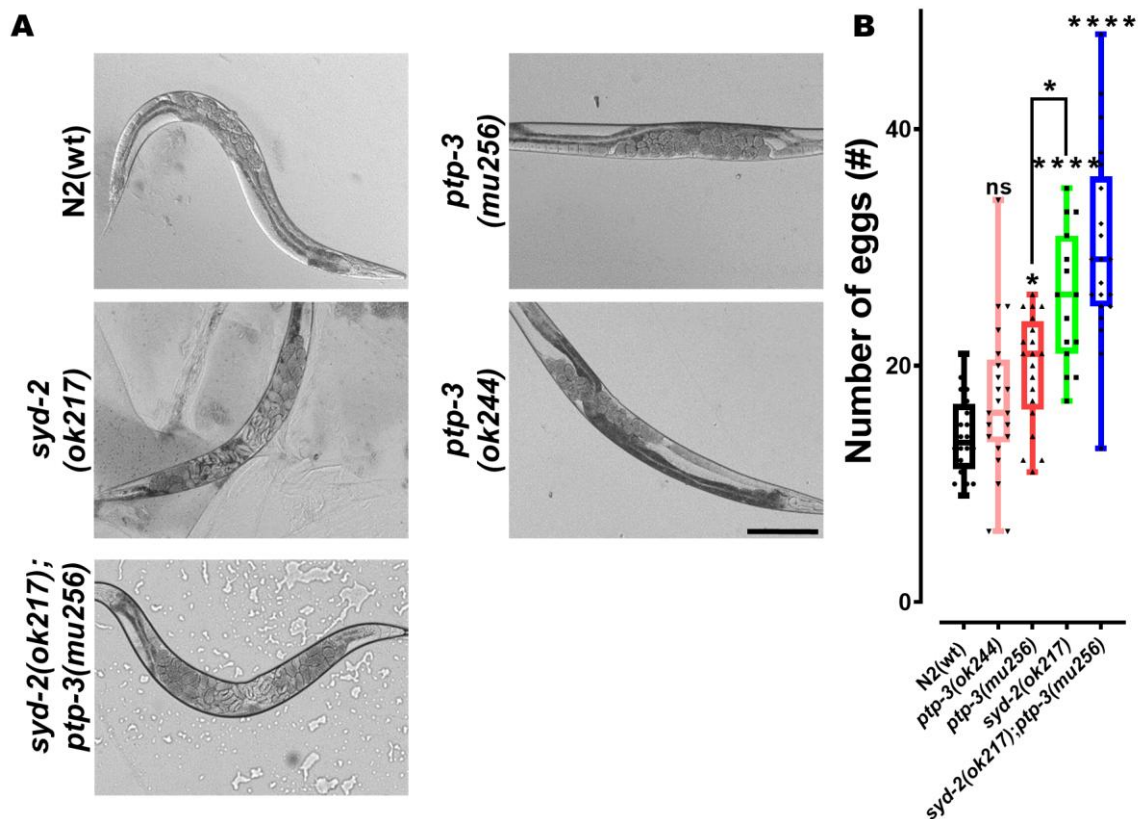

**Figure S2.** Mild egg retention phenotype in *ptp-3* mutants. (A) Images of worms with accumulated unlaidd eggs inside the bodies of mutants (mild hatch-bag phenotypes). (B) Quantification of eggs re-

tained inside worms. Scale bar: 100  $\mu$ m. Error bars:  $\pm$  max. and min. range. One-way ANOVA with Dunnett's multiple comparison test. \*  $p < 0.05$ , \*\*  $p < 0.005$ , \*\*\*  $p < 0.001$  and \*\*\*\*  $p < 0.0001$ .

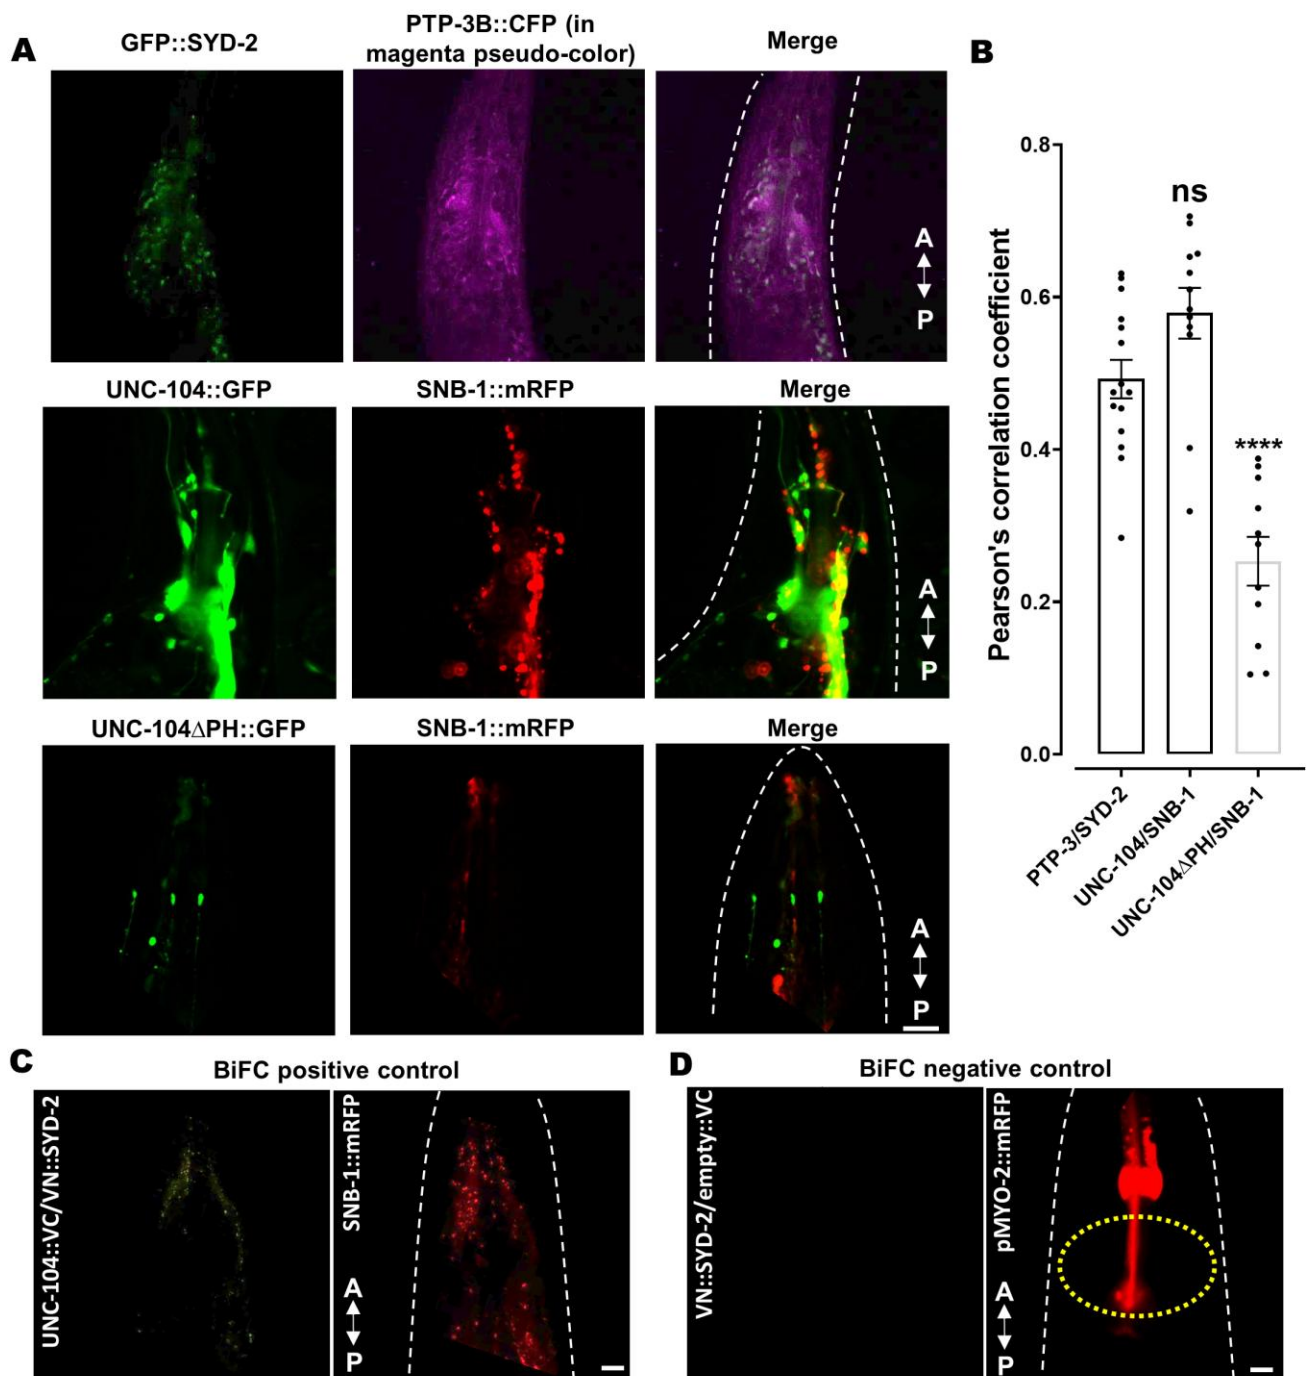

**Figure S3.** Control experiments for colocalization and BiFC studies. (A) Images of worms expressing SYD-2/PTP-3B, UNC-104/SNB-1 (positive control) and UNC-104 $\Delta$ PH/SNB-1 (negative control). (B) Quantification of Pearson's correlation coefficient values from images shown in (A). (C)

Representative image of a nerve ring from a BiFC positive control worm (UNC-104::VN/VC::SYD2 with SNB-1::mRFP as neuronal marker). (D) Image of nerve ring region from a BiFC negative control worm (VN::SYD-2/empty::VC). Note that to avoid bleed through artifacts in negative control, we refrained from overexpressing any (red) fluorescent neuronal marker. Instead, we used a pharyngeal marker (*Pmyo-2::mrfp*) to locate the position of the nerve ring (yellow, dotted line) and screened through all confocal planes for BiFC signal at that location. Scale bar: 10  $\mu$ m. Error bars:  $\pm$  SEM. One-way ANOVA with Dunnett's multiple comparison test. \*\*\*\* p<0.0001.

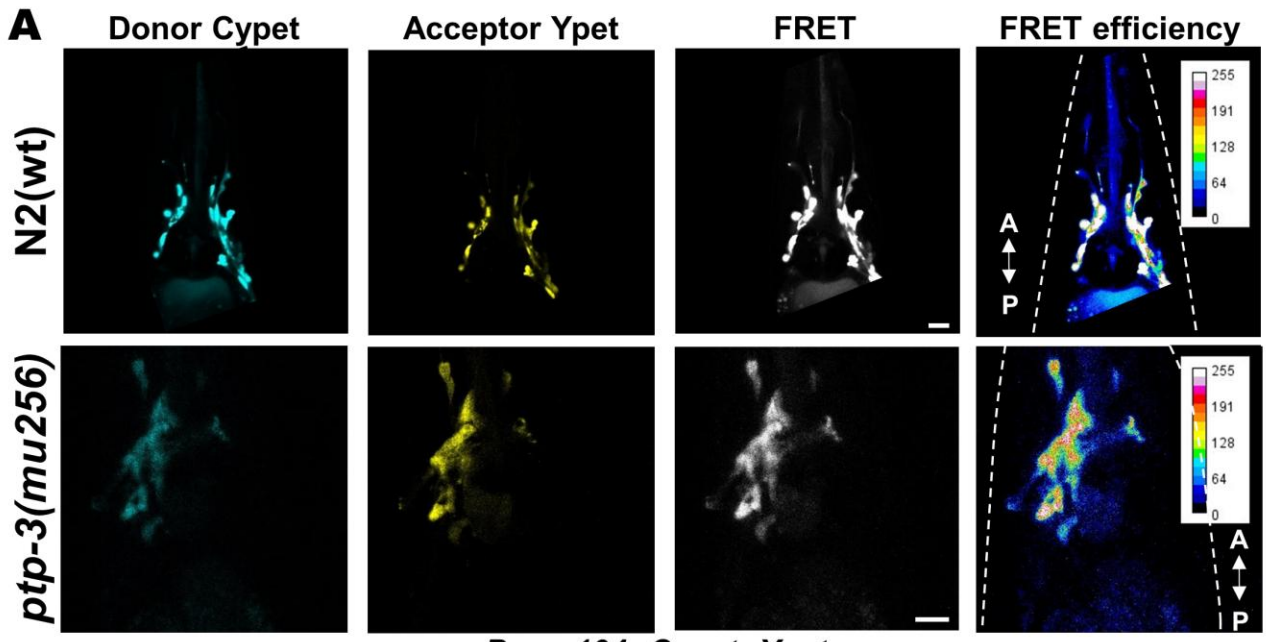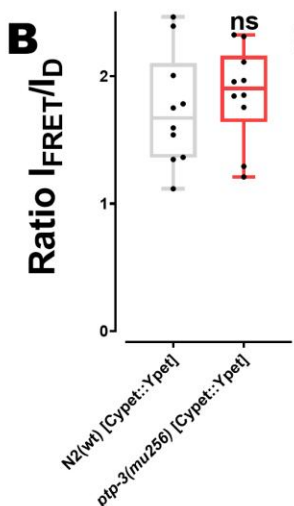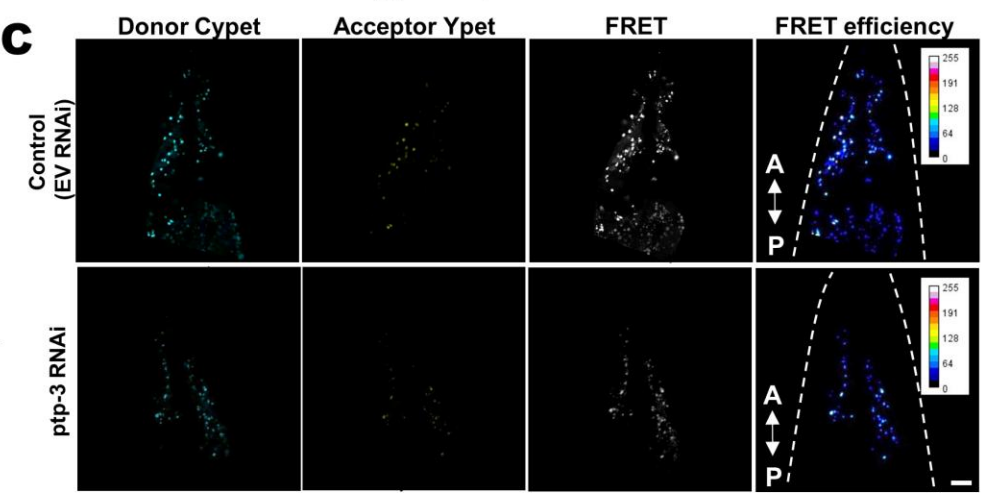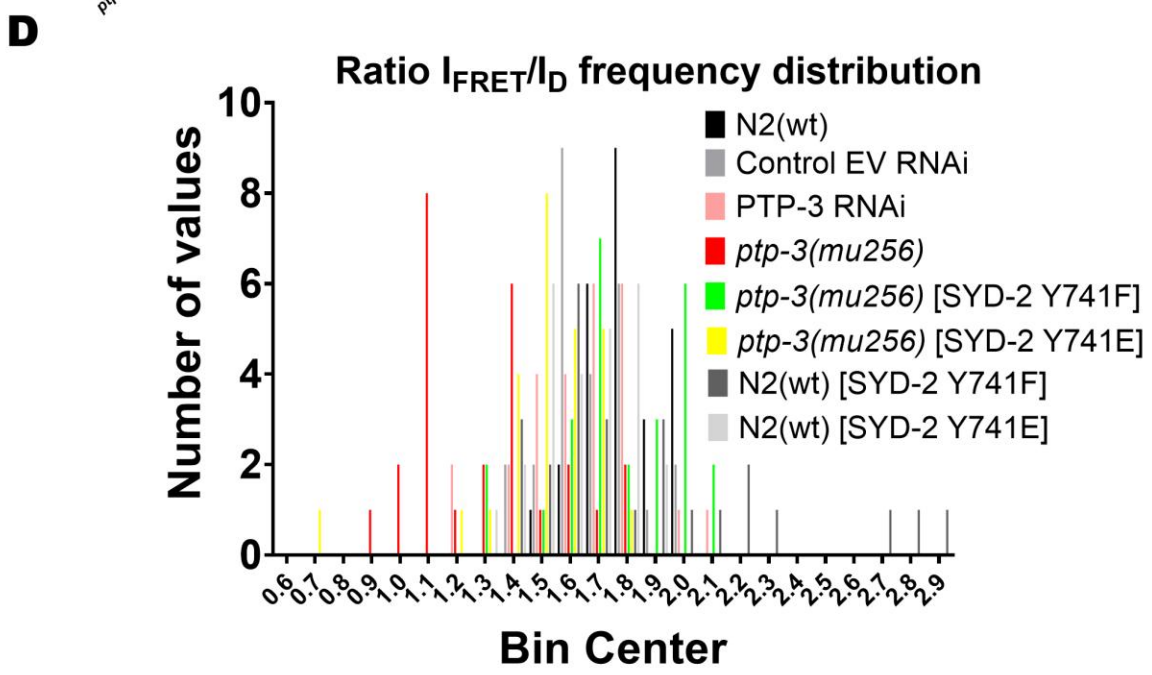

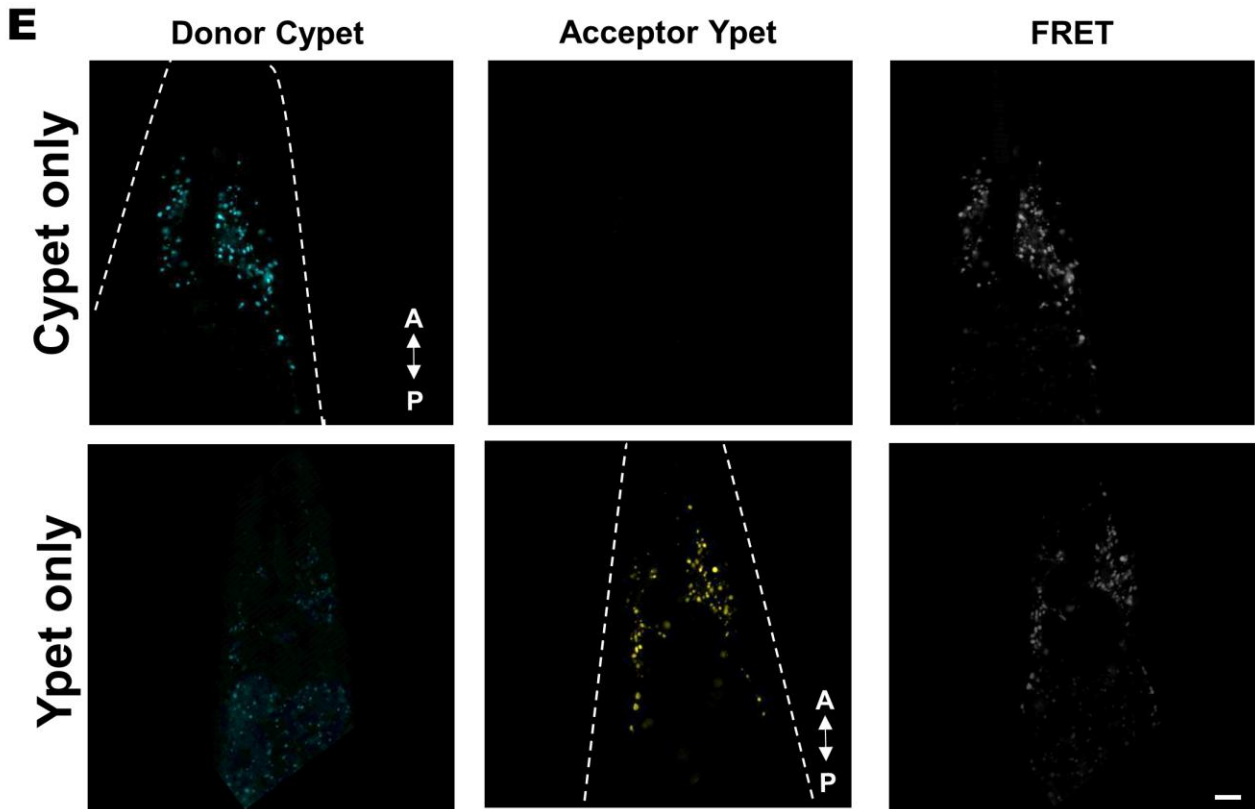

**Figure S4.** Control experiments for FRET studies. (A) FRET images of worms expressing Cypet::Ypet without the *syd-2* gene in either N2(wt) or *ptp-3(mu256)* mutants. (B) Quantification of FRET ratios of images from (A) revealing no significant differences between N2(wt) and *ptp-3(mu256)* mutants. (C) FRET images of worms treated with either control (empty RNAi vector) or *ptp-3* RNAi. (D) Frequency distribution of  $I_{\text{FRET}}/I_{\text{D}}$  ratio data from Figure 3C. (E) FRET images of bleed-through controls. Note that subtraction of bleed-through signal is not necessary in *intramolecular* FRET because the ratio of donor/acceptor is supposed to be always 1 (different from *intermolecular* FRET with varying ratios). Dotted, white line marks the contour of the worm head. Scale bar: 10  $\mu\text{m}$ . Unpaired Student's t-test with Welch's correction.

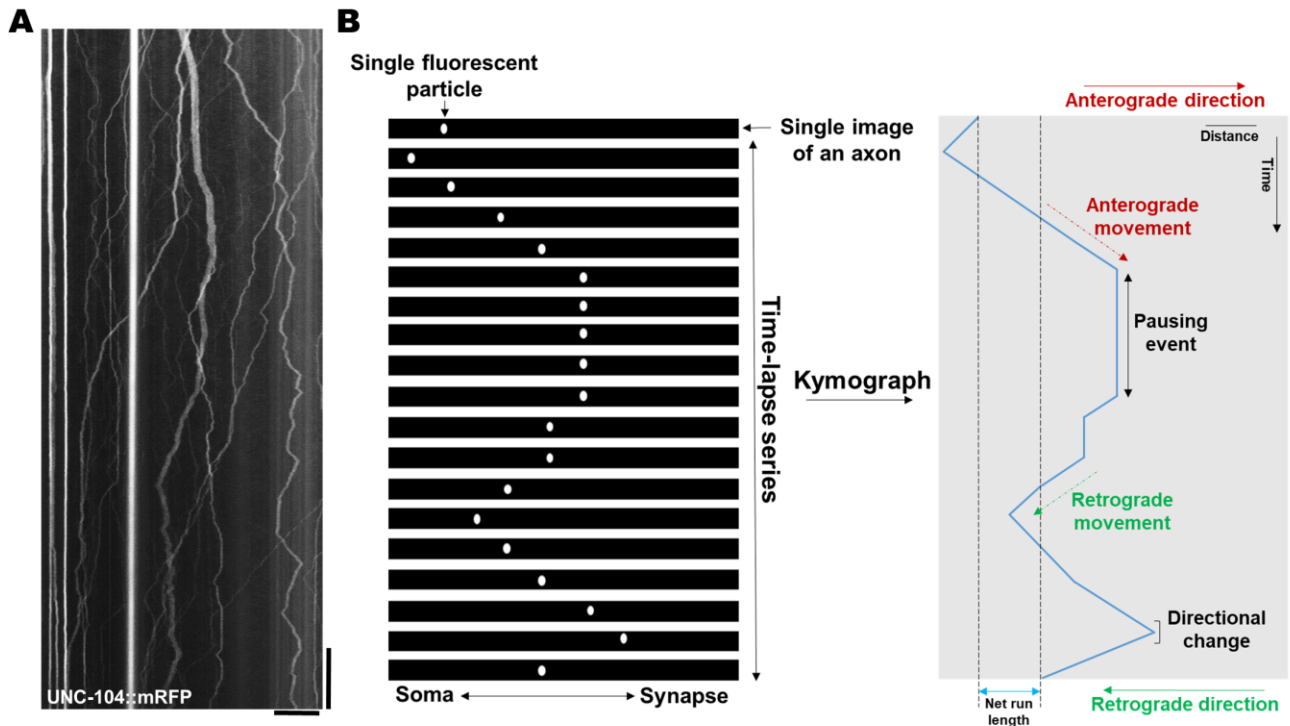

**Figure S5.** Kymograph description and definition of motility occurrences. (A) Example of a kymograph (UNC-104::mRFP motilities). (B) To generate a kymograph a video of a neuron is “resliced”: All images that have been captured in this time-lapse series are stacked upon each other resulting in traces left behind by moving particles. In the right-hand cartoon, a blue line indicates the position of the fluorescent particle along the axon at increments of time. Red and green dotted arrows indicate anterograde and retrograde directions, respectively. Black double-headed arrow indicates a pausing event of the fluorescent particle. Square bracket reveals a directional change event. From the slope of the blue line in the kymograph, velocity can be calculated. Run length is the distance between two spatial positions of a particle. Total run length is the sum of all run lengths events of this particle. Net run length is marked by a blue double-headed arrow. Vertical scale bar: 25 sec and horizontal scale bar: 10  $\mu\text{m}$ .



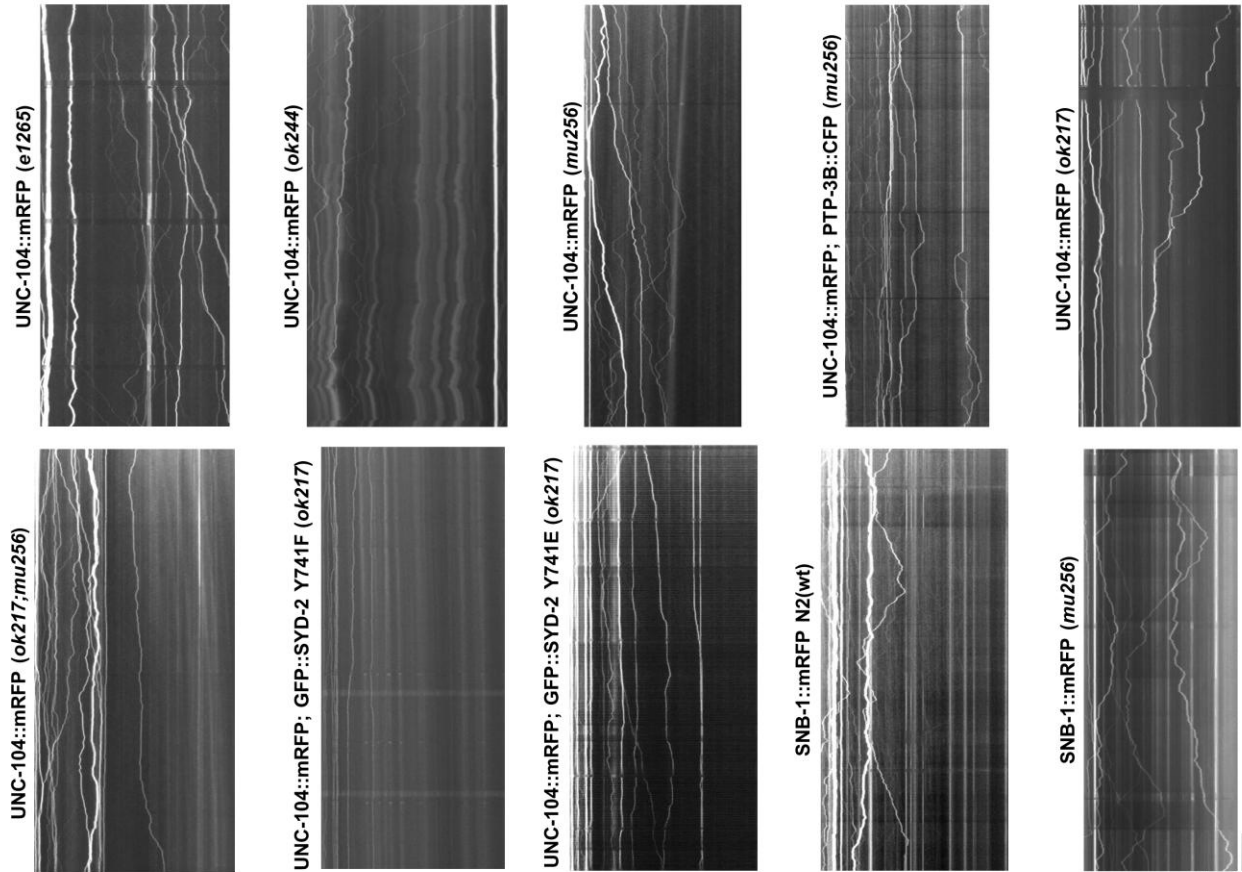

**Figure S6.** Examples of generated kymographs for this study. In this Figure, representative kymographs from worms expressing UNC-104::mRFP or SNB-1::mRFP in different genetic backgrounds are shown which have been used for motility analysis in Figure 6. Vertical scale bar: 25 sec and horizontal scale bar: 10  $\mu$ m.

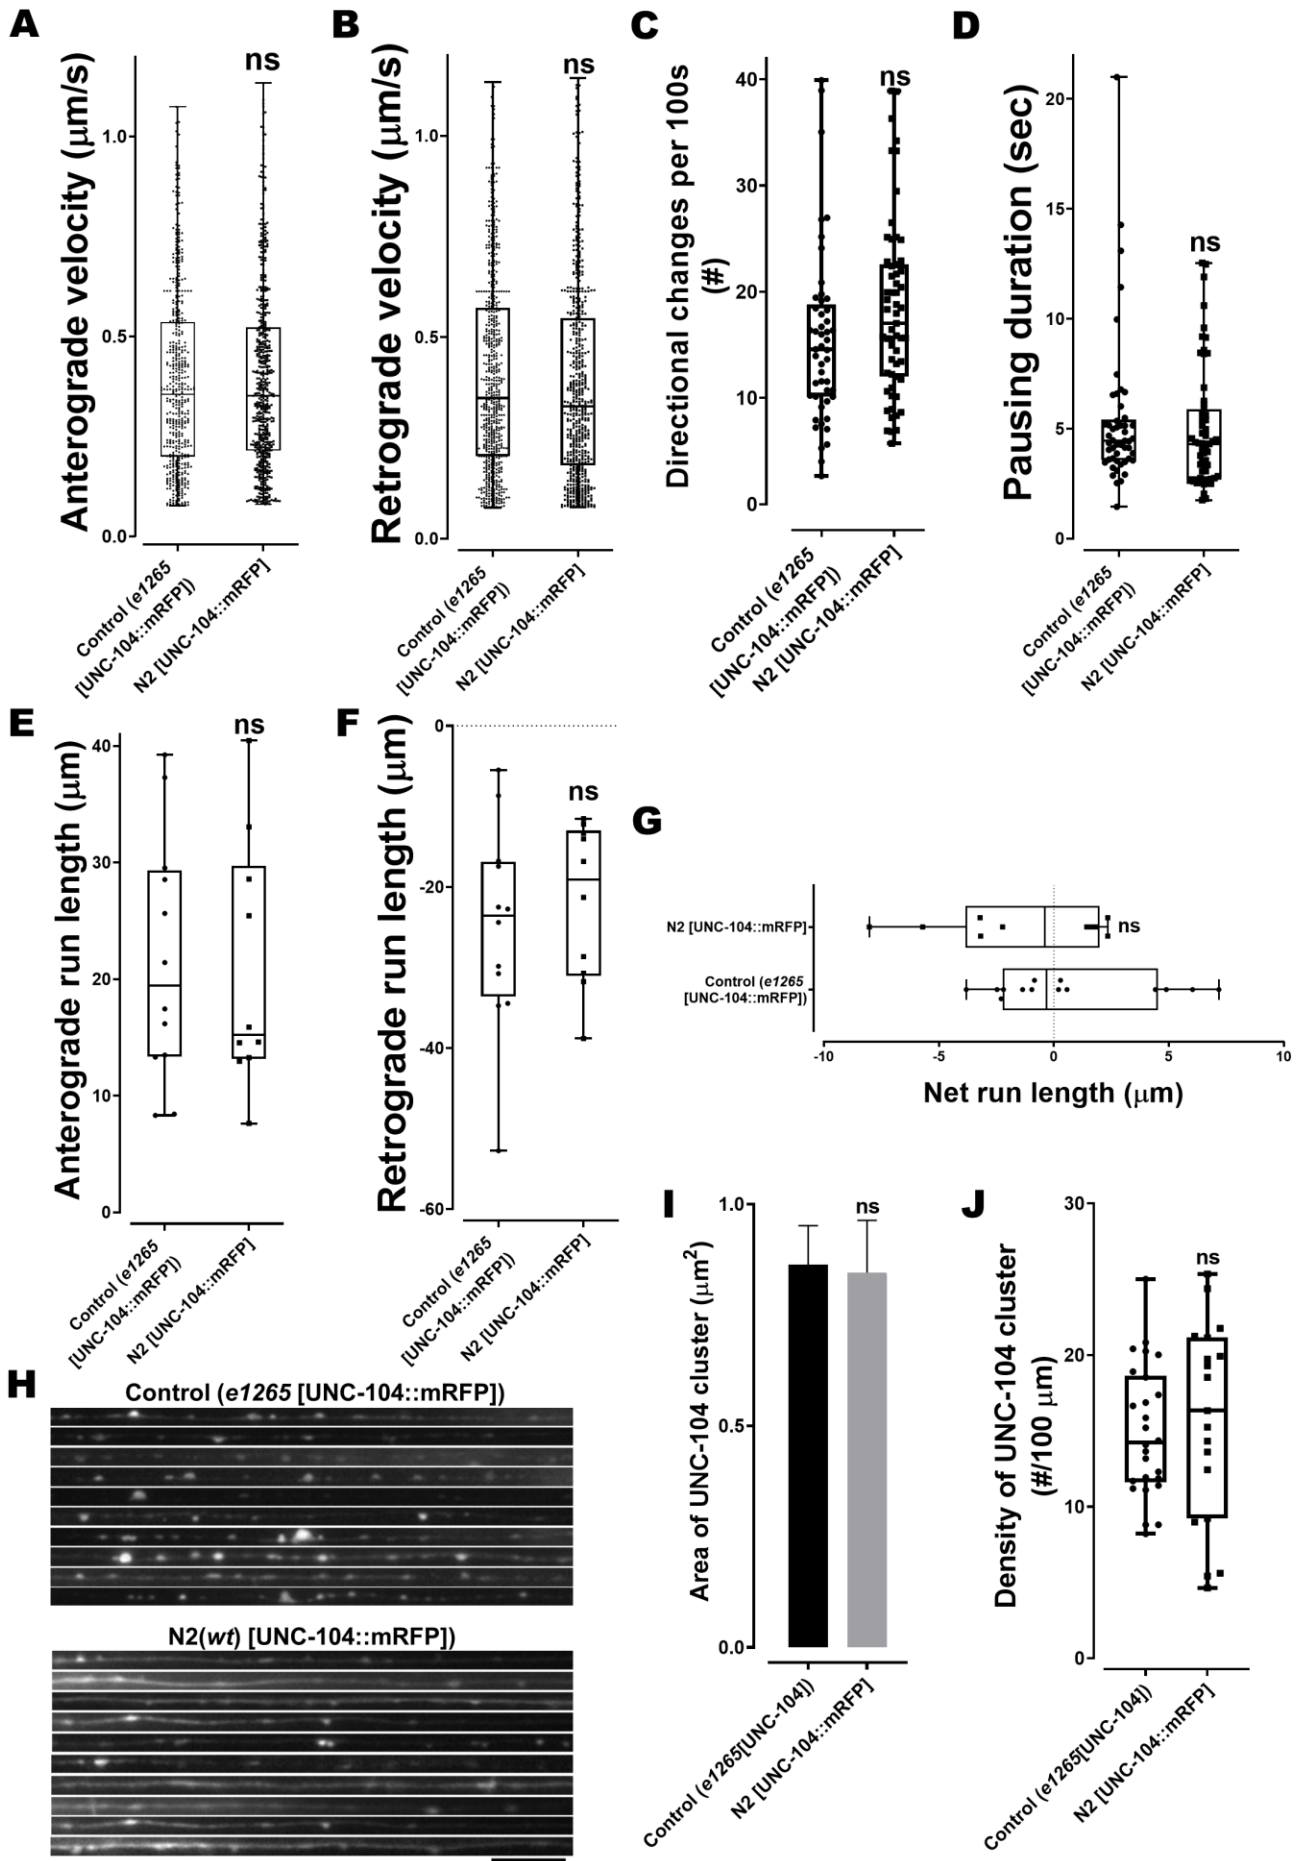

**Figure S7.** Motility parameters and UNC-104 clustering in CB1265 (*e1265*)[UNC-104::mRFP] compared to *N2(wt)*[UNC-104::mRFP]. (A) Anterograde velocity, (B) retrograde velocity, (C) directional changes (motor reversals), (D) pausing duration, (E) anterograde run length, (F) retrograde run length, (G) net run length, (H) straightened sublateral neurites for cluster analysis, (I) area of UNC-104 particle in sublateral neurites, and (J) cluster density. Scale bar: 10  $\mu$ m. Number of events in motility data > 1500 events. Unpaired Student's t-test.

# A Anterograde velocity frequency distribution

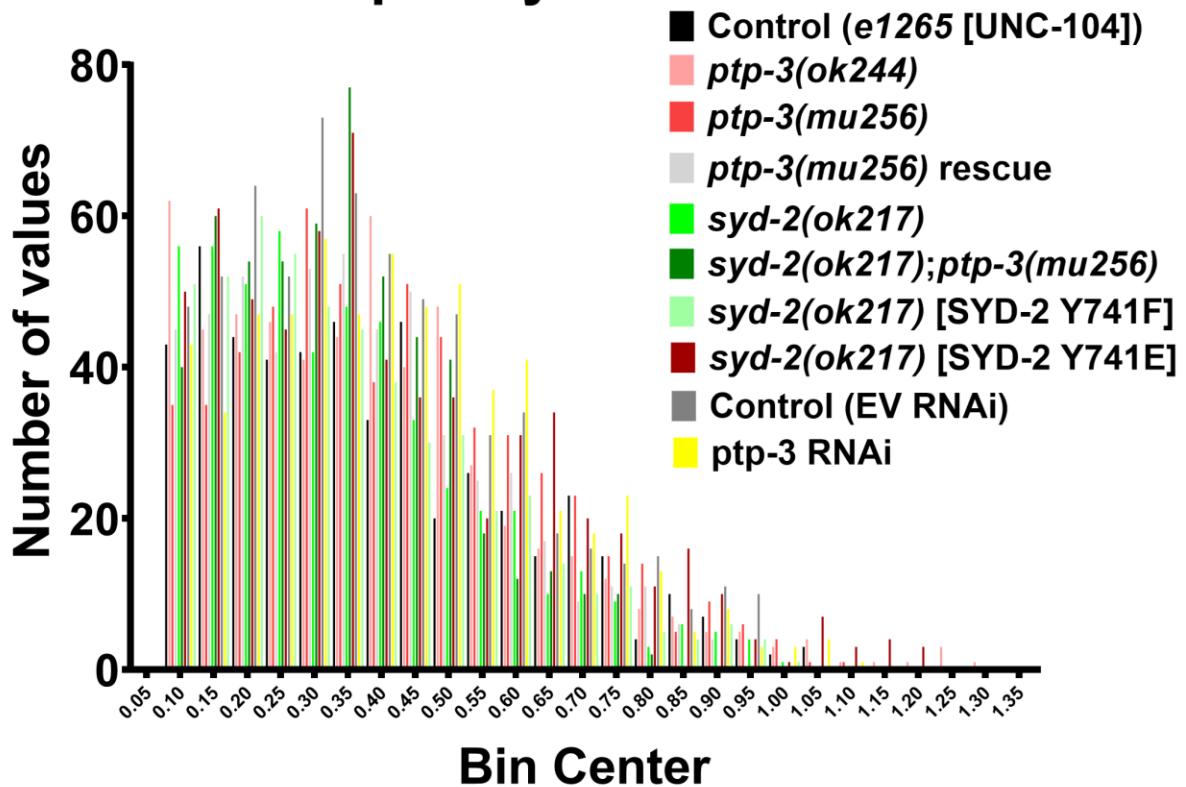

# B Retrograde velocity frequency distribution

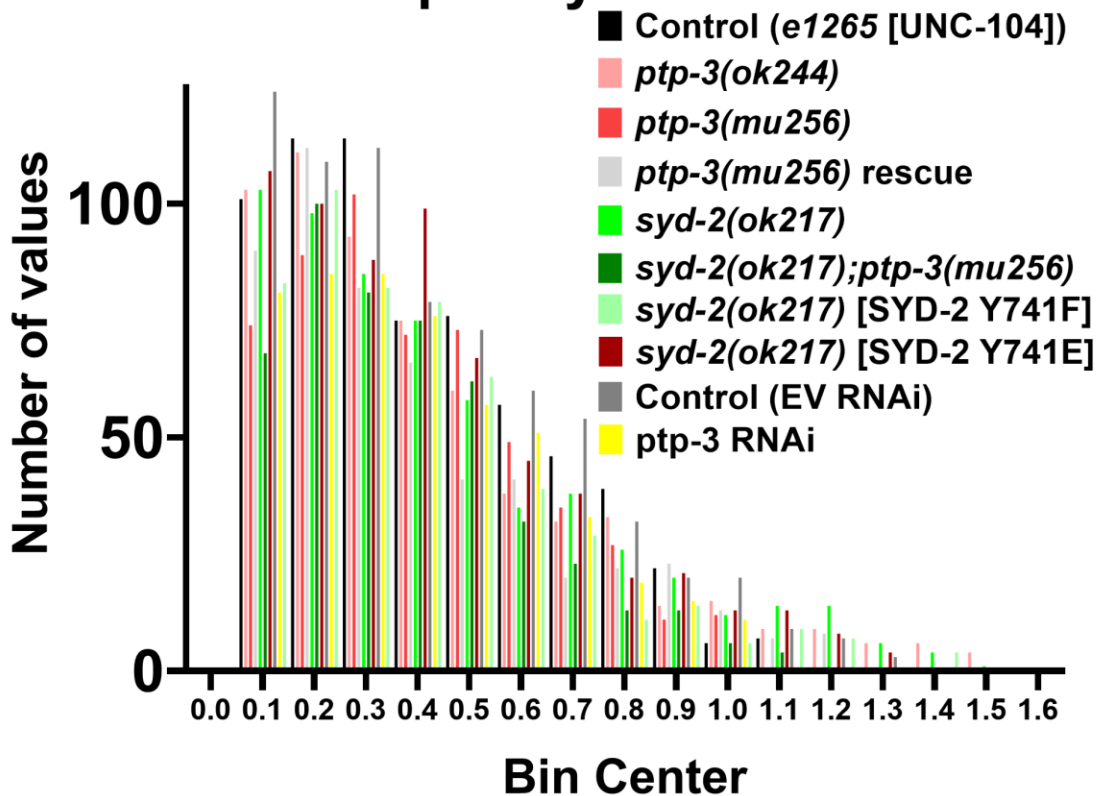

**C****Anterograde velocity frequency distribution of SNB-1**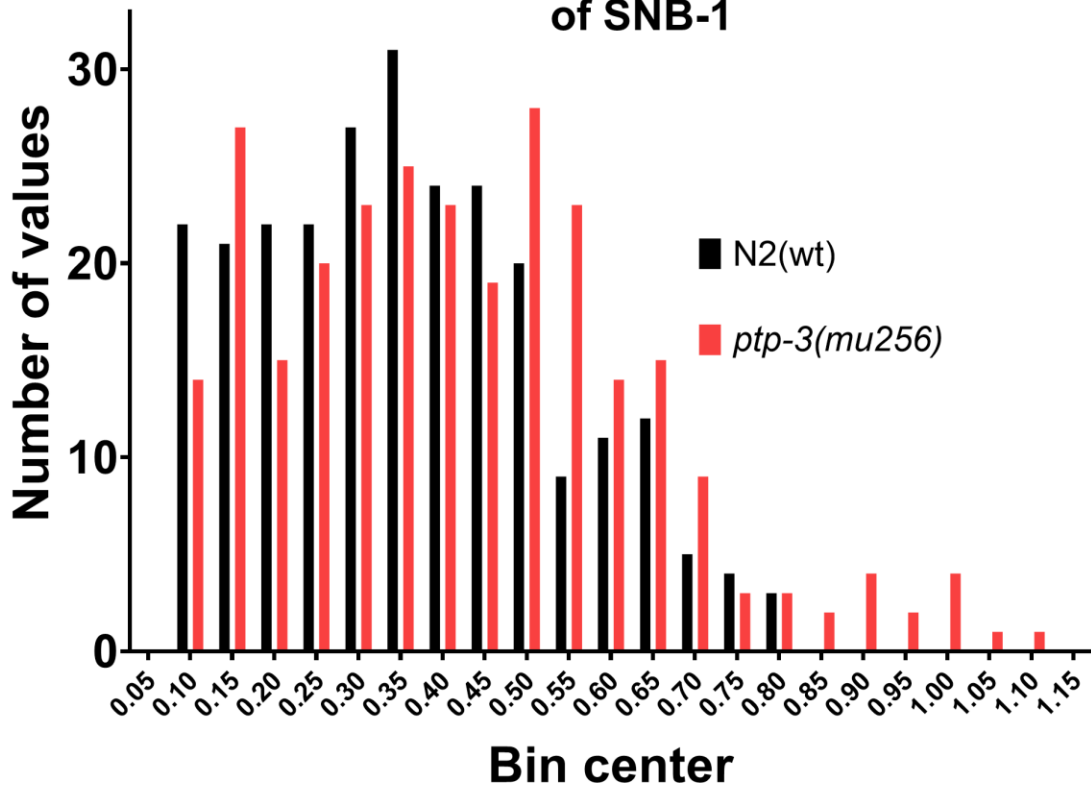**D****Retrograde velocity frequency distribution of SNB-1**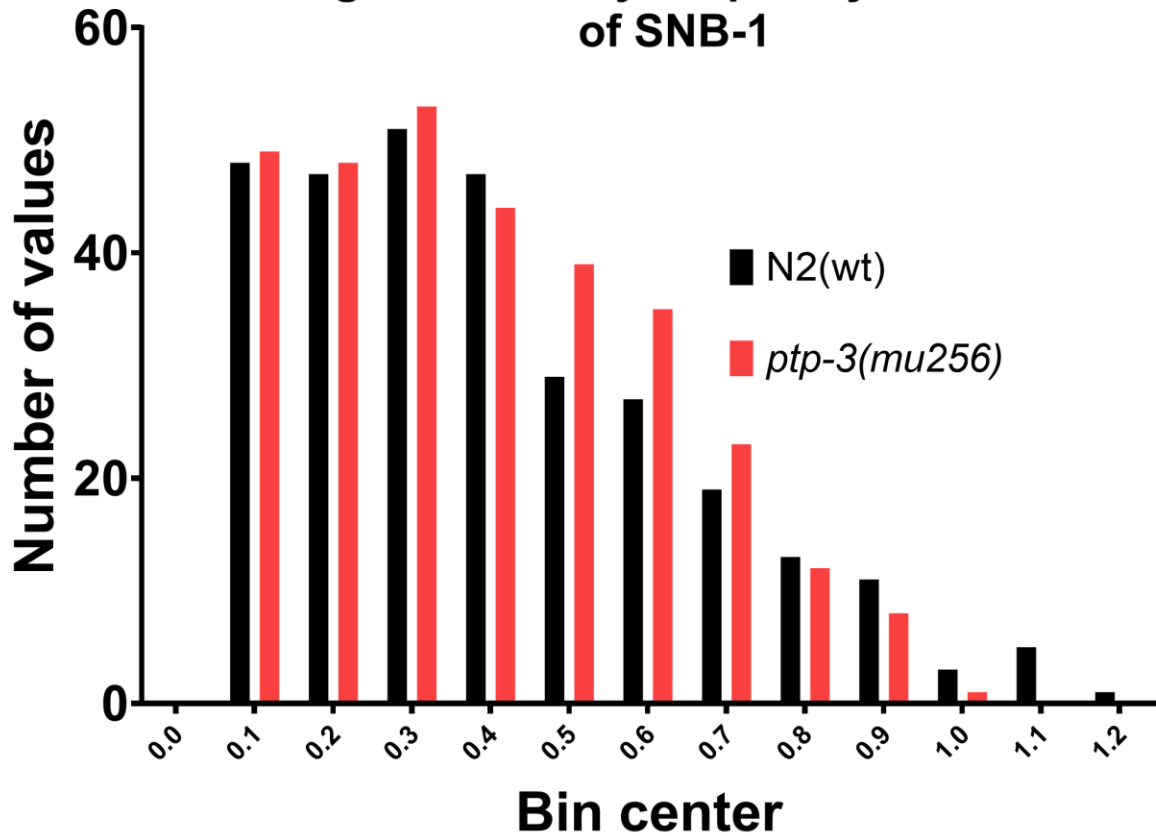

**Figure S8.** Frequency distribution of UNC-104 and SNB-1 velocity data. (A) Frequency distribution of UNC-104 anterograde velocity (data from Figure 6A). (B) Frequency distribution of UNC-104 retrograde velocity data (data from Figure 6B). (C) Frequency distribution of SNB-1 anterograde velocity data (data from Figure 6A). (D) Frequency distribution of SNB-1 retrograde velocity (data from Figure 6B).
